# Supplementary material for: Robust effects of corticothalamic feedback and behavioral state on movie responses in mouse dLGN
Source: eLife journal article supplement (doi:10.7554/elife.70469), 2022-03-22

Prediction:

Grating 

**a<sub>0</sub>**

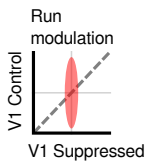

**a<sub>1</sub>**

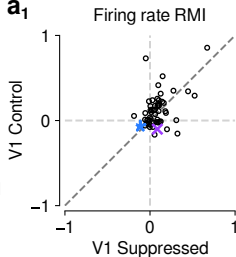

**a<sub>2</sub>**

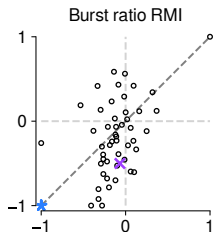

**b<sub>0</sub>**

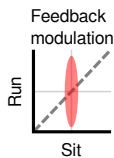

**b<sub>1</sub>**

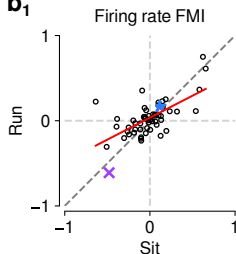

**b<sub>2</sub>**

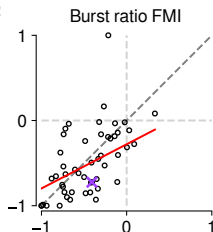

**c<sub>0</sub>**

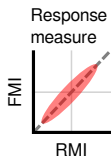

**c<sub>1</sub>**

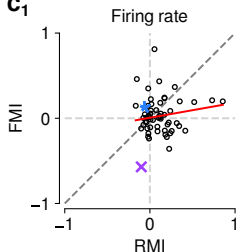

**c<sub>2</sub>**

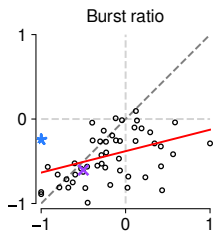

Supplement: supp [file elife-70469-supp-v1.zip]
