# Supplementary figures and images for: Robust effects of corticothalamic feedback and behavioral state on movie responses in mouse dLGN
Source: eLife journal article supplement (doi:10.7554/elife.70469), 2022-03-22

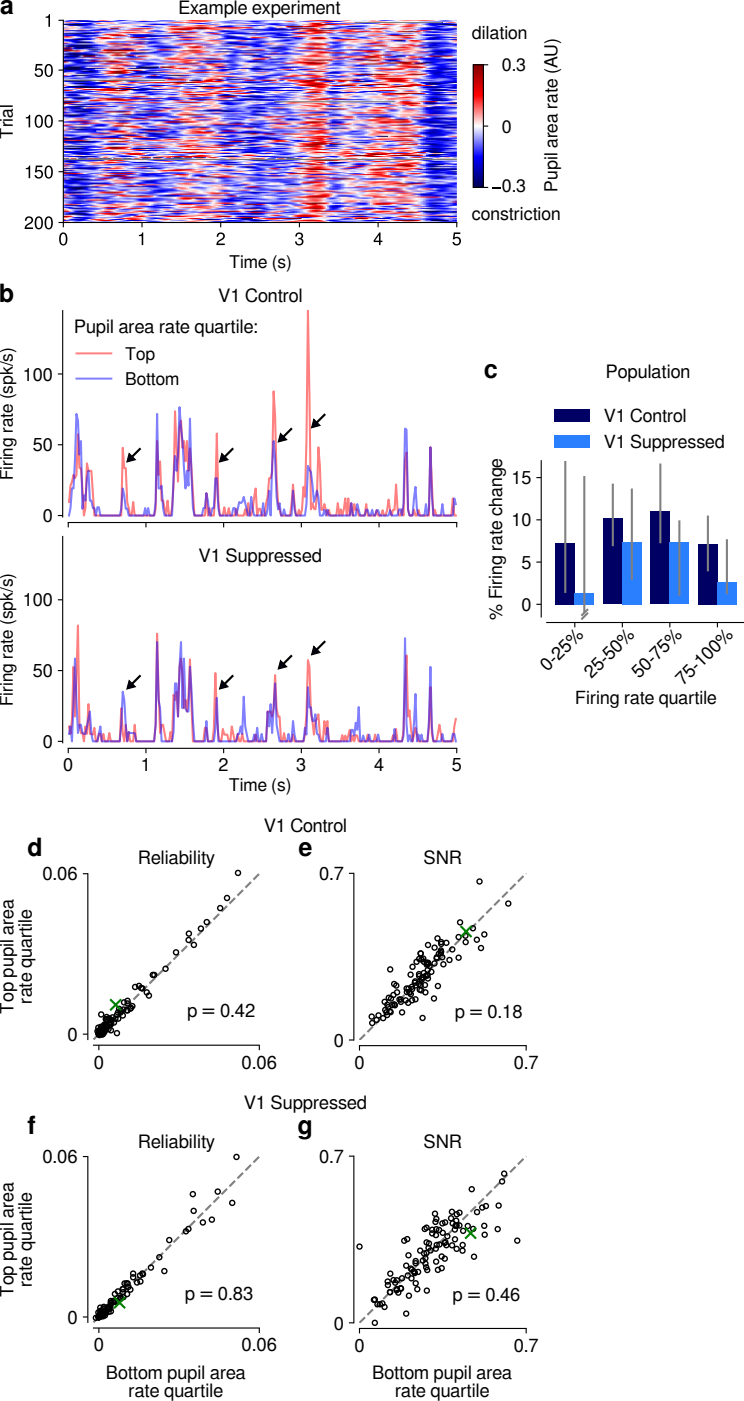

Supplement: supp [file elife-70469-supp-v1.zip]

Movie

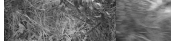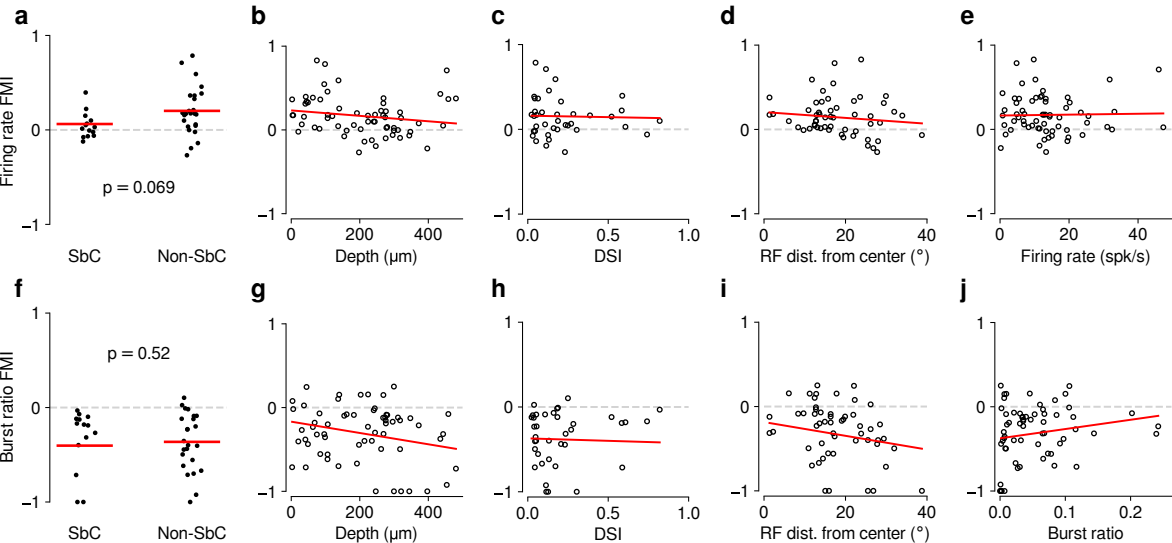

Supplement: supp [file elife-70469-supp-v1.zip]

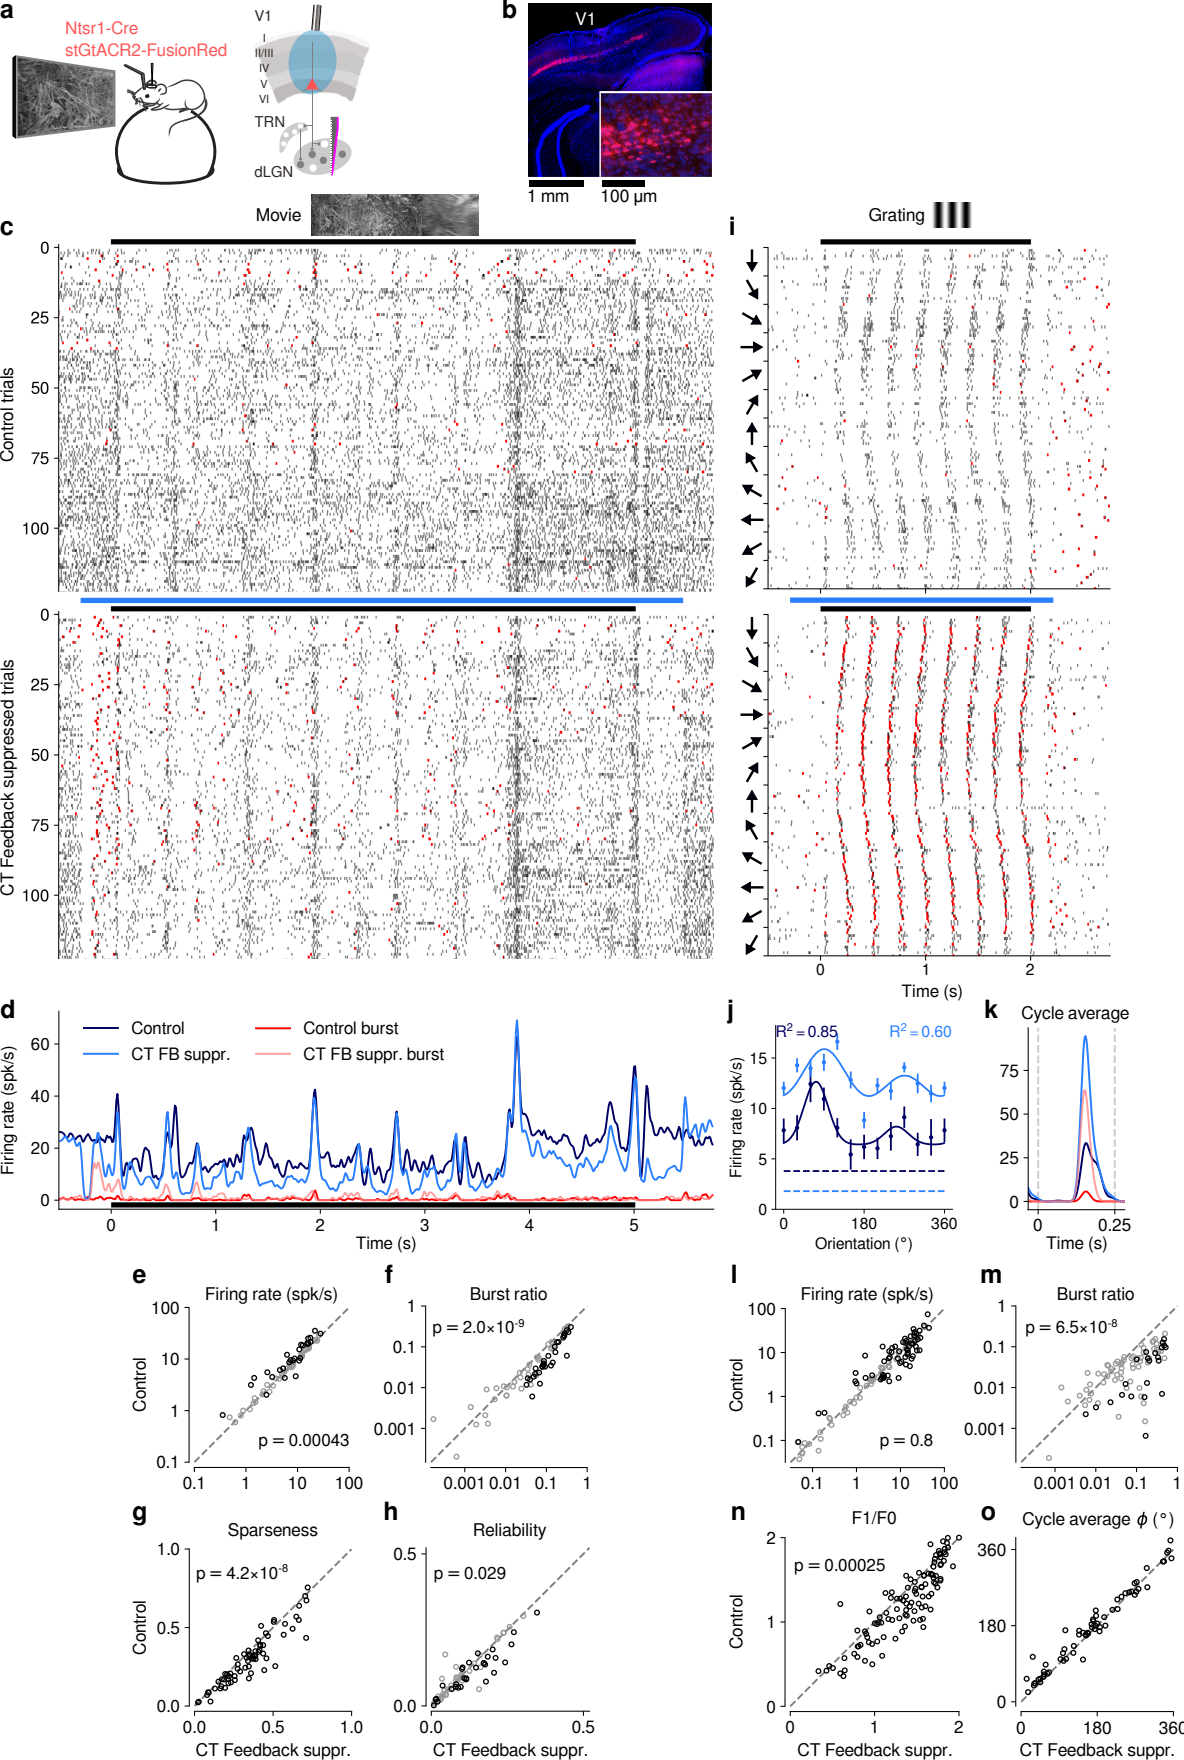

Supplement: supp [file elife-70469-supp-v1.zip]

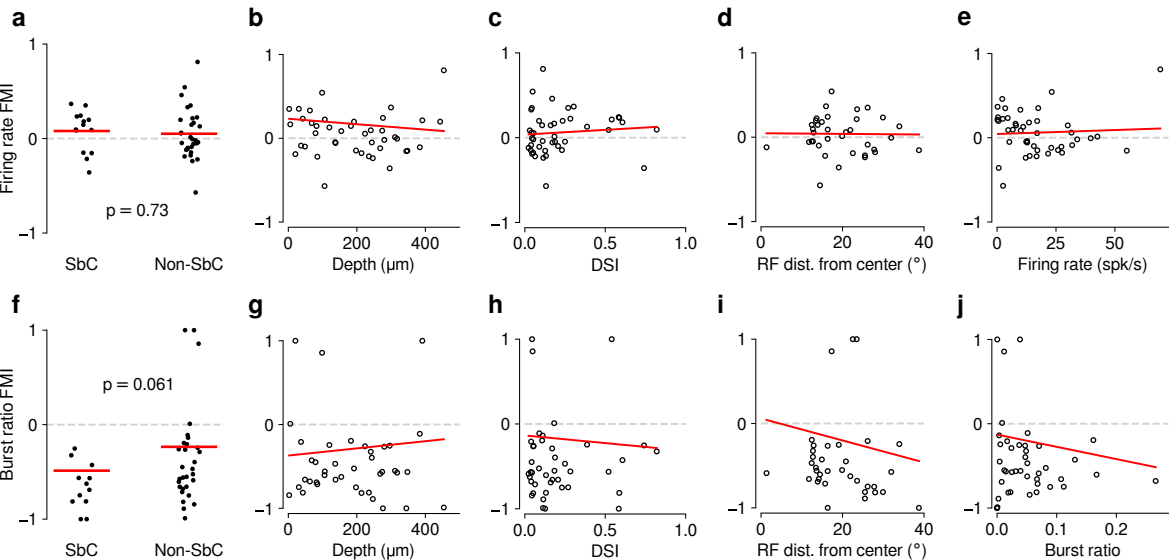

Supplement: supp [file elife-70469-supp-v1.zip]

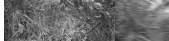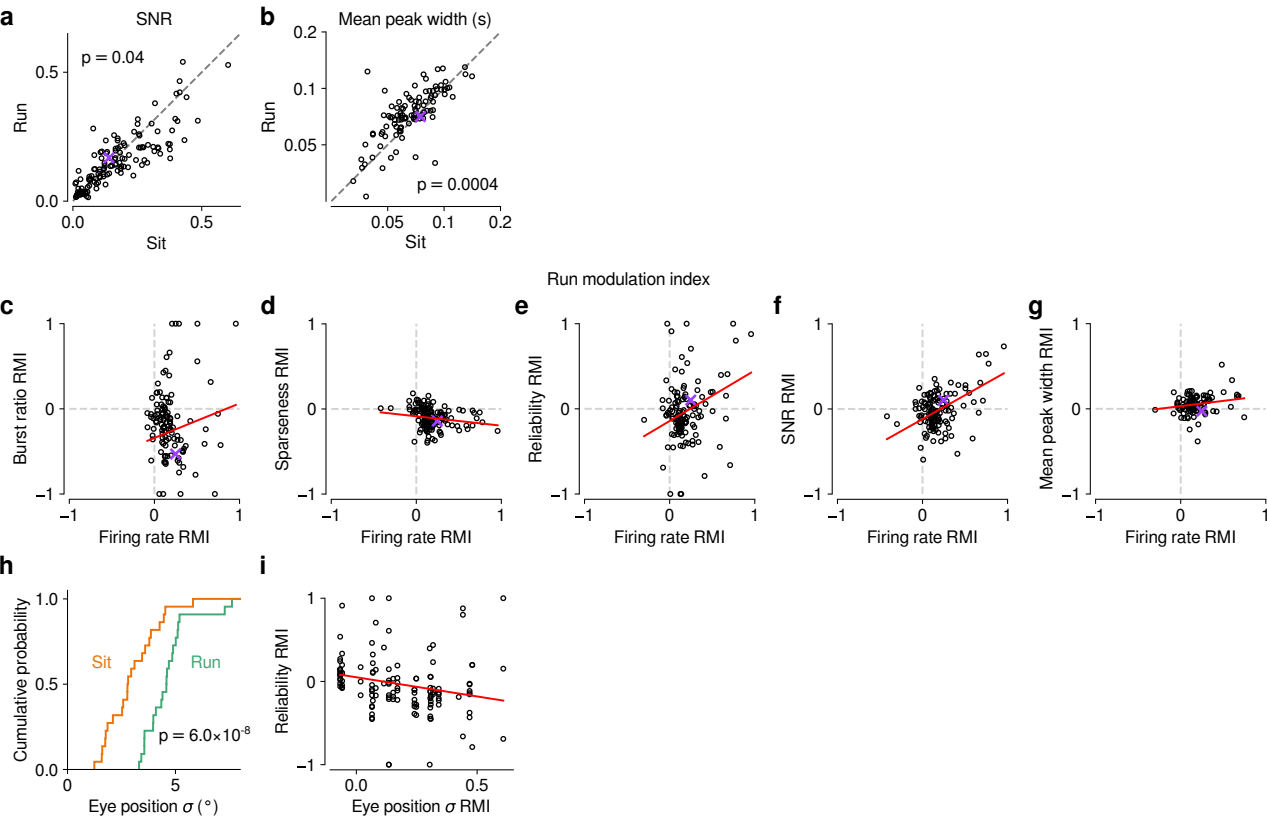

Supplement: supp [file elife-70469-supp-v1.zip]

Movie

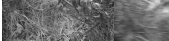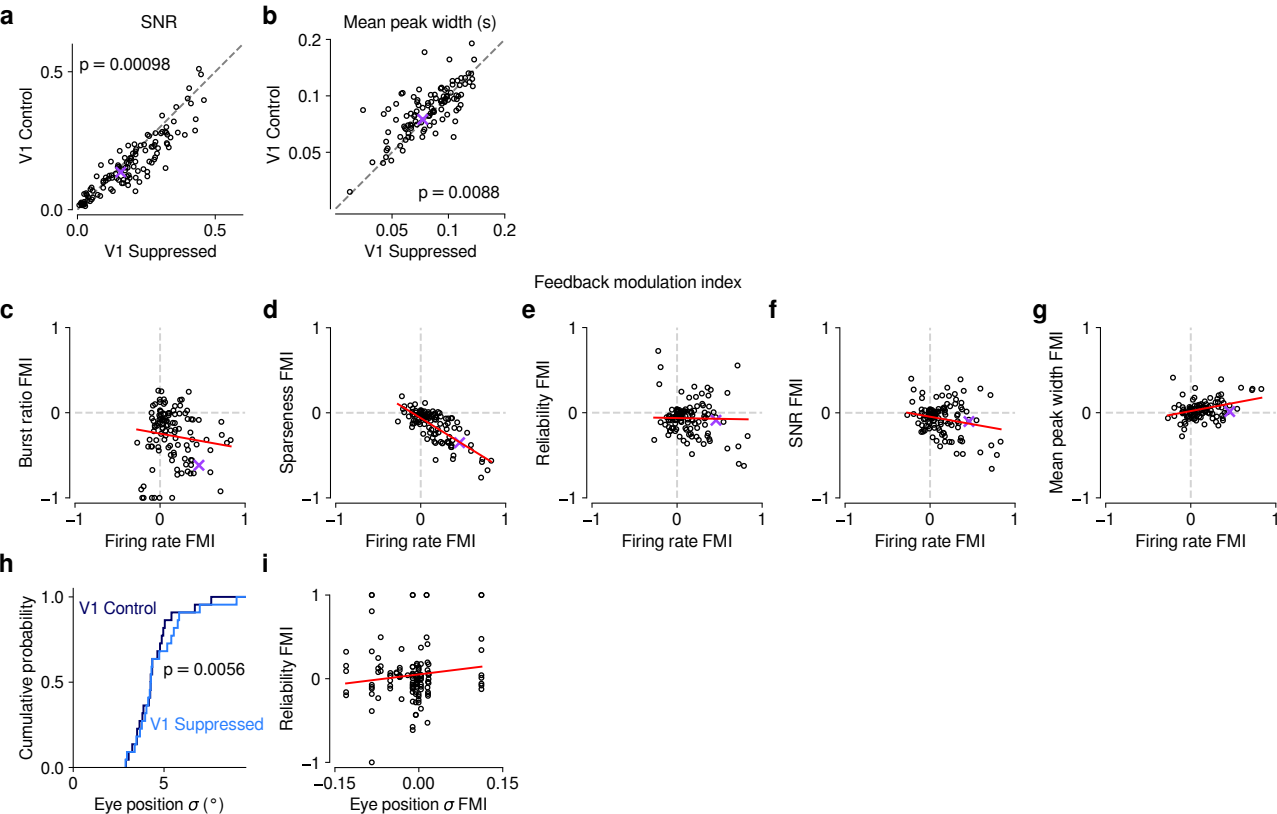

Supplement: supp [file elife-70469-supp-v1.zip]

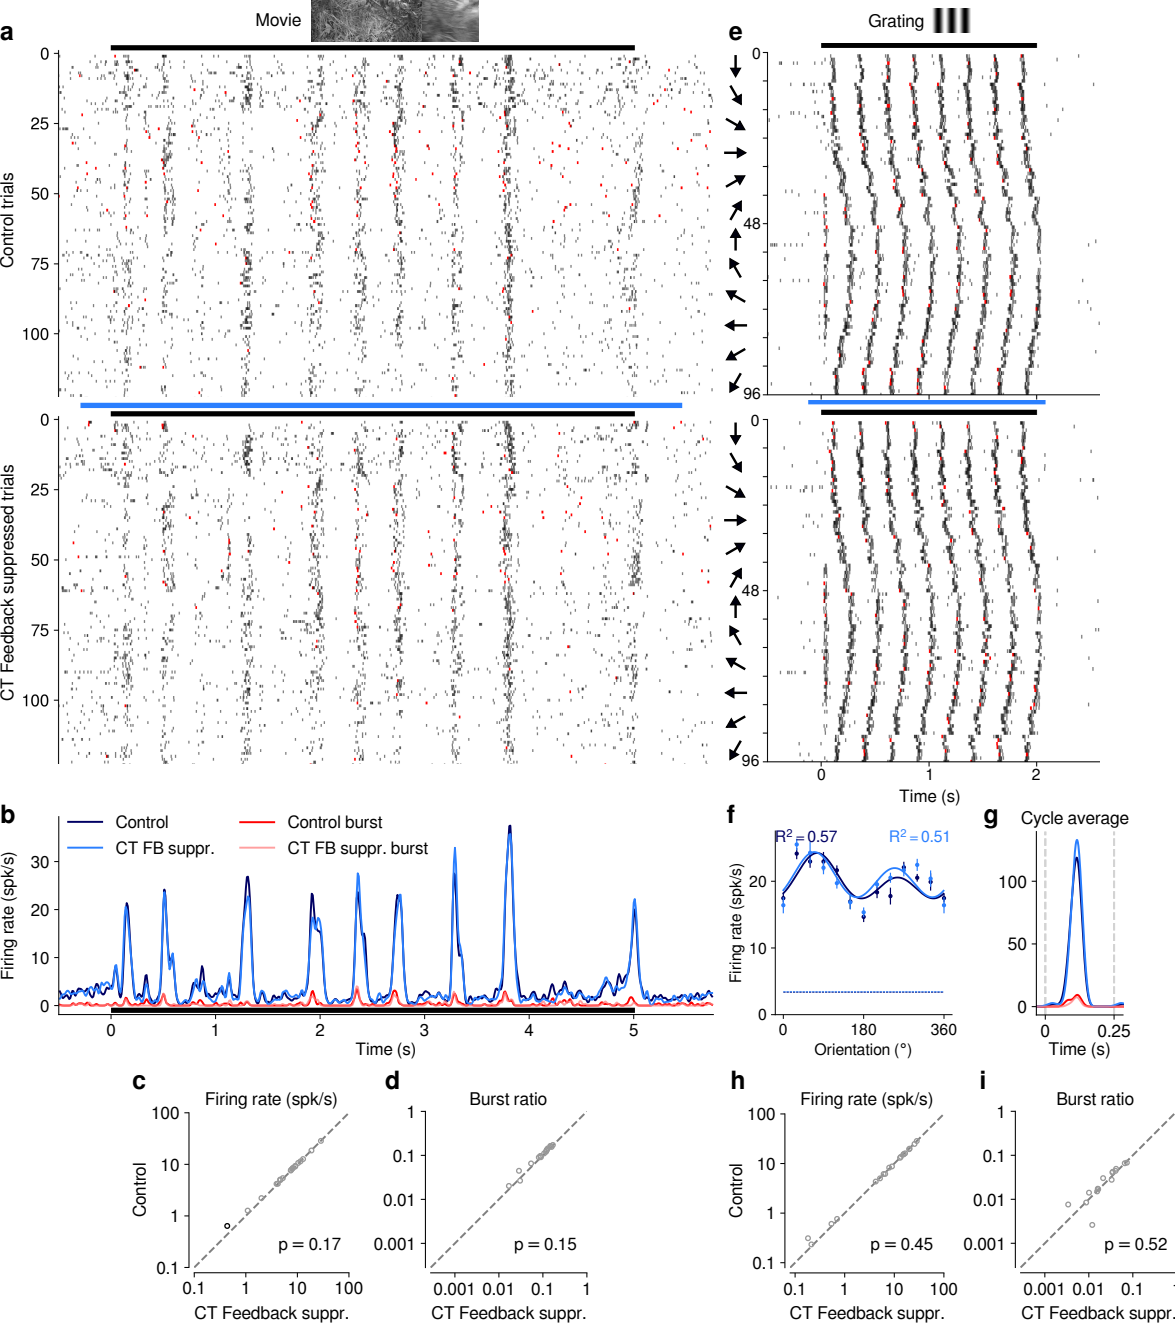

Supplement: supp [file elife-70469-supp-v1.zip]

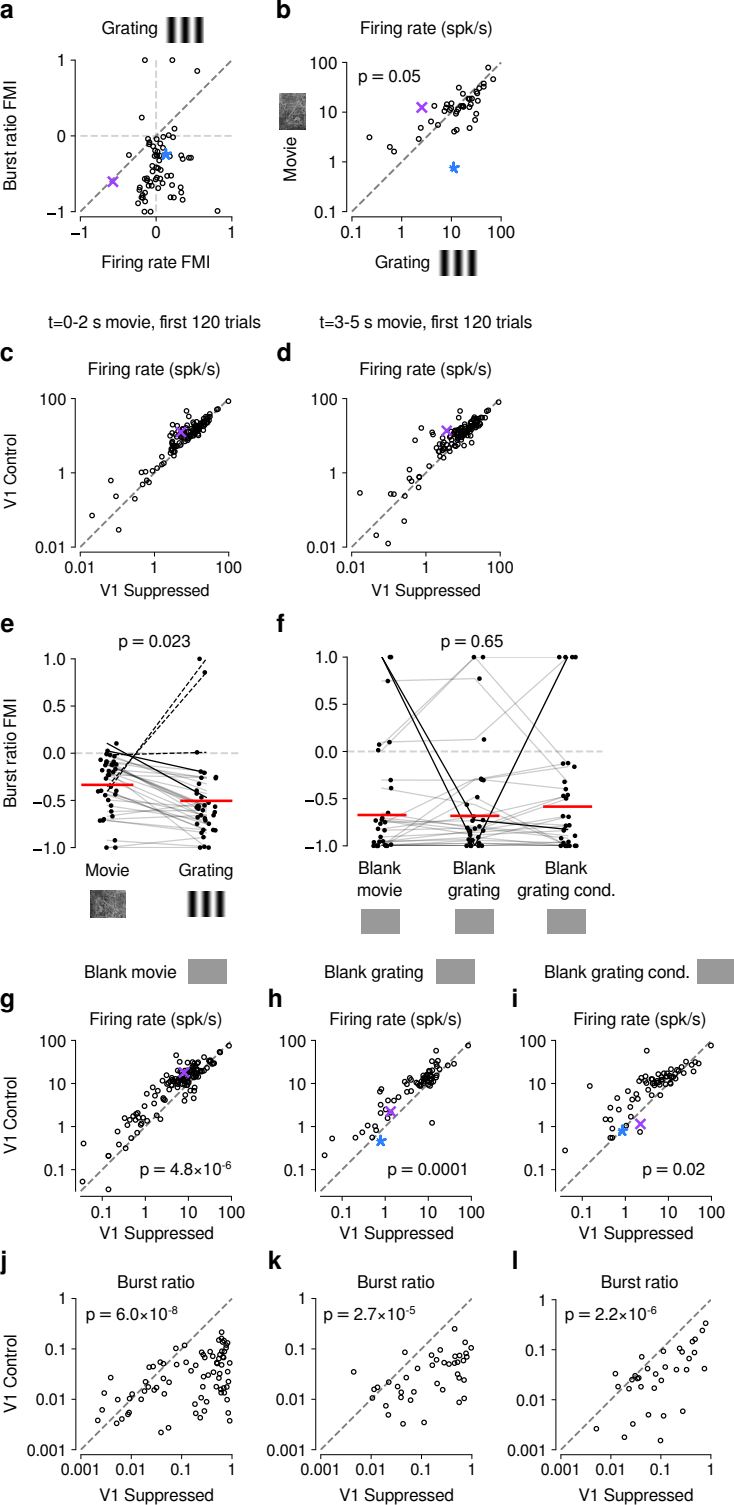

Supplement: supp [file elife-70469-supp-v1.zip]

**a**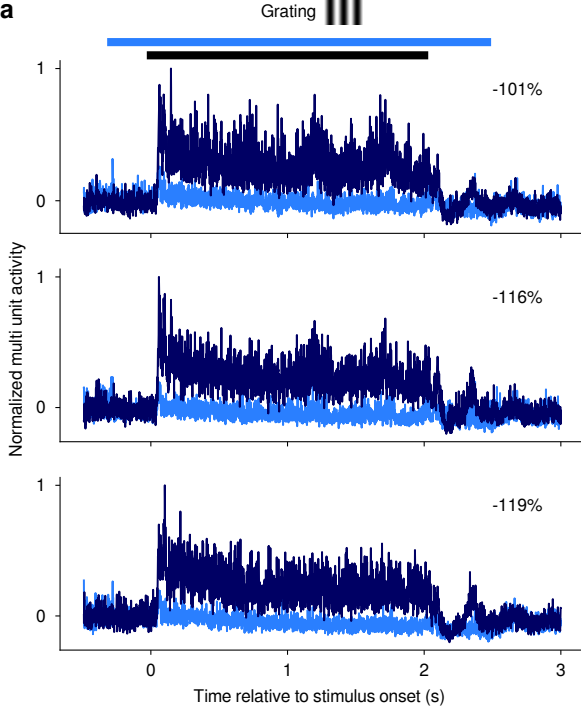**b**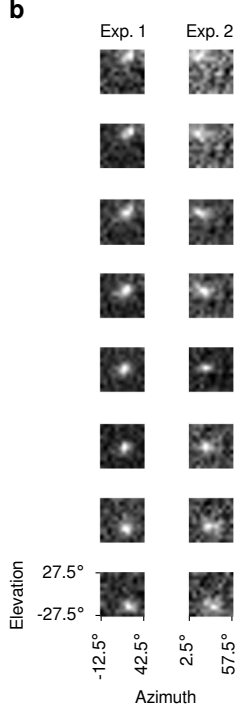

Supplement: supp [file elife-70469-supp-v1.zip]

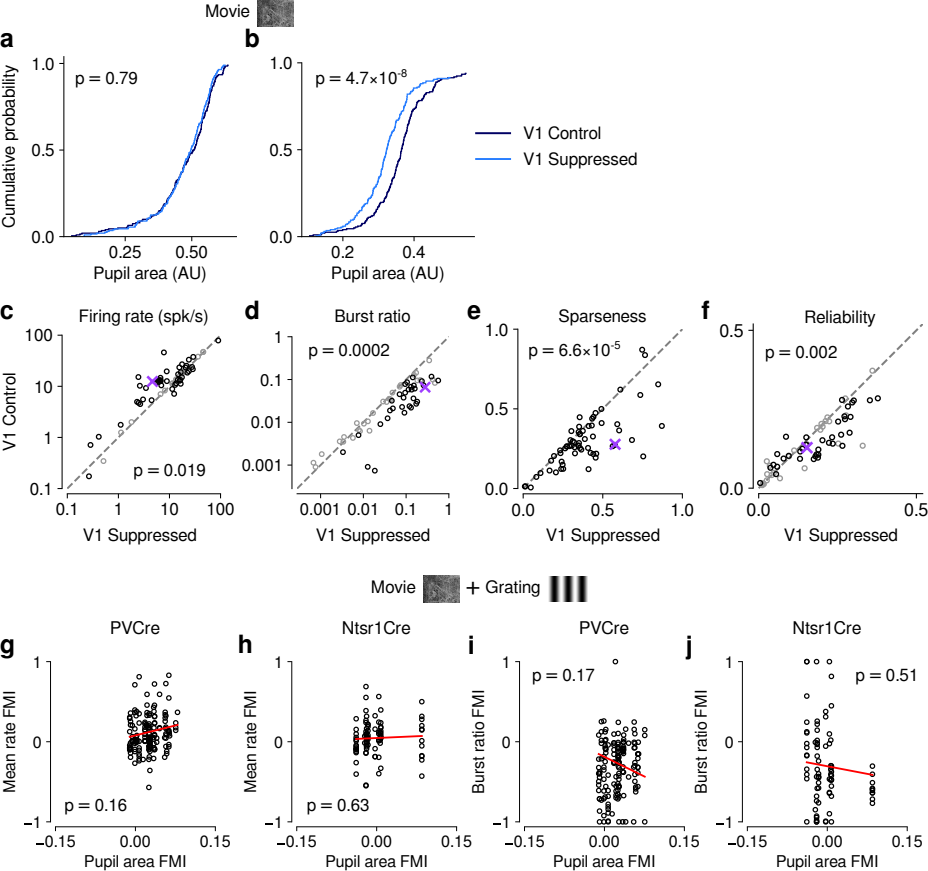

Supplement: supp [file elife-70469-supp-v1.zip]
